# Supplementary material
Source: MDPI journal article supplement (https://www.mdpi.com/2077-0472/11/4/373)
Supplement: s1 [file s1]

**Table S1.** Maize yield and yield components at different experimental sites in 2017 and 2018. The statistical test method was the least significant difference (LSD) method. Data shown were means  $\pm$  the standard deviation.

| Site               | Ear length<br>(cm) | Ear rows<br>(row) | Line grain<br>number<br>(grain) | Bald tip<br>(cm)  | 100-grain<br>weight<br>(g) | Bare plant<br>rate<br>(%) | Yield<br>(kg ha <sup>-1</sup> ) |
|--------------------|--------------------|-------------------|---------------------------------|-------------------|----------------------------|---------------------------|---------------------------------|
| <b>2017</b>        |                    |                   |                                 |                   |                            |                           |                                 |
| Fuping             | 15.78 $\pm$ 0.34c  | 14.4 $\pm$ 0.6bc  | 32.1 $\pm$ 1.0bc                | 0.00 $\pm$ 0.00c  | 35.02 $\pm$ 1.05b          | 0.98 $\pm$ 0.68a          | 10441.75 $\pm$ 39.12a           |
| Hancheng           | 17.53 $\pm$ 0.92a  | 15.2 $\pm$ 0.6a   | 35.5 $\pm$ 2.5bc                | 0.62 $\pm$ 0.71bc | 33.23 $\pm$ 1.38c          | 0.07 $\pm$ 0.16b          | 9846.98 $\pm$ 93.30b            |
| Linwei             | 17.78 $\pm$ 0.52a  | 14.6 $\pm$ 0.4ab  | 35.5 $\pm$ 1.4bc                | 0.50 $\pm$ 0.46bc | 43.50 $\pm$ 1.41a          | 0.00 $\pm$ 0.00b          | 8346.50 $\pm$ 433.50d           |
| Sanyuan            | 13.50 $\pm$ 0.45d  | 14.0 $\pm$ 0.6bc  | 26.4 $\pm$ 1.7c                 | 0.40 $\pm$ 0.23c  | 31.17 $\pm$ 2.04d          | 1.50 $\pm$ 0.33a          | 9020.50 $\pm$ 57.77c            |
| Huxian             | 16.62 $\pm$ 0.37b  | 13.0 $\pm$ 0.3d   | 32.8 $\pm$ 0.7b                 | 1.10 $\pm$ 0.19b  | 31.07 $\pm$ 0.67d          | 1.83 $\pm$ 0.81a          | 8264.75 $\pm$ 162.82d           |
| Fufeng             | 15.20 $\pm$ 0.31c  | 13.9 $\pm$ 0.2bc  | 30.5 $\pm$ 1.4c                 | 1.73 $\pm$ 0.94a  | 35.55 $\pm$ 1.60b          | 0.00 $\pm$ 0.00b          | 9217.13 $\pm$ 139.55c           |
| Qishan             | 17.27 $\pm$ 1.06ab | 13.7 $\pm$ 1.2cd  | 31.7 $\pm$ 2.3bc                | –                 | 30.40 $\pm$ 0.82d          | 1.40 $\pm$ 1.40a          | 8258.50 $\pm$ 590.45d           |
| <b>2018</b>        |                    |                   |                                 |                   |                            |                           |                                 |
| Fuping             | 17.8 $\pm$ 0.6bc   | 15.0 $\pm$ 0.5b   | 34.8 $\pm$ 1.8b                 | 0.17 $\pm$ 0.41ab | 36.60 $\pm$ 1.37b          | 5.38 $\pm$ 1.52a          | 10140.25 $\pm$ 67.27ab          |
| Hancheng           | 17.7 $\pm$ 0.9bc   | 15.7 $\pm$ 1.2a   | 38.3 $\pm$ 3.8a                 | 0.50 $\pm$ 0.45a  | 34.23 $\pm$ 3.07c          | 0.02 $\pm$ 0.04c          | 9867.50 $\pm$ 62.43b            |
| Linwei             | 18.8 $\pm$ 0.5a    | 14.3 $\pm$ 1.0bc  | 38.0 $\pm$ 0.4a                 | 0.00 $\pm$ 0.00b  | 40.75 $\pm$ 2.14a          | 0.00 $\pm$ 0.00c          | 9421.25 $\pm$ 601.04c           |
| Sanyuan            | 14.9 $\pm$ 1.4e    | 13.0 $\pm$ 0.4d   | 31.0 $\pm$ 3.0c                 | 0.23 $\pm$ 0.16ab | 32.40 $\pm$ 1.79c          | 2.43 $\pm$ 1.33b          | 9051.00 $\pm$ 175.62d           |
| Huxian             | 18.2 $\pm$ 0.3ab   | 14.6 $\pm$ 0.2bc  | 38.3 $\pm$ 0.9a                 | 0.22 $\pm$ 0.12ab | 32.83 $\pm$ 0.48c          | 1.83 $\pm$ 0.34b          | 8837.00 $\pm$ 32.45d            |
| Fufeng             | 16.1 $\pm$ 0.4d    | 14.2 $\pm$ 0.2c   | 34.9 $\pm$ 0.7b                 | 0.37 $\pm$ 0.57ab | 32.88 $\pm$ 0.35c          | 0.00 $\pm$ 0.00c          | 10429.75 $\pm$ 161.46a          |
| Qishan             | 17.2 $\pm$ 0.3c    | 14.4 $\pm$ 0.6bc  | 38.5 $\pm$ 1.1a                 | 0.30 $\pm$ 0.36ab | 32.50 $\pm$ 2.20c          | 1.32 $\pm$ 2.17bc         | 7013.50 $\pm$ 224.02e           |
| Year               | 45.67**            | 6.32*             | 103.85**                        | 20.85**           | 0.83                       | 13.41**                   | 10.40**                         |
| Site               | 51.31**            | 13.49**           | 27.98**                         | 6.10**            | 63.04**                    | 21.22**                   | 130.11**                        |
| Year $\times$ Site | 3.62**             | 5.38**            | 2.23*                           | 4.86**            | 4.99**                     | 9.48**                    | 28.22**                         |

Different letters within a column indicate significant differences between regions in 2017 and 2018.

**Table S2.** Pearson correlation between yield components and rainfall(mm) at different growth stages of maize in 2017 and 2018. Data shown were coefficient between two variables.

| Correlation         | Ear length(cm) | Ear rows(row) | Line grain<br>number(grain) | Bald tip<br>length(cm) | 100-grain<br>weight(g) | Bare plant<br>rate(%) |
|---------------------|----------------|---------------|-----------------------------|------------------------|------------------------|-----------------------|
| Emergence–Tasseling | 0.528          | 0.266         | 0.750**                     | –0.372                 | –0.088                 | 0.015                 |
| Emergence–Silking   | 0.595*         | 0.212         | 0.789**                     | –0.294                 | –0.179                 | –0.001                |
| Emergence–Maturity  | 0.129          | –0.179        | 0.079                       | 0.308                  | –0.48                  | –0.555                |
| Tasseling–Maturity  | –0.291         | –0.327        | –0.487                      | 0.501                  | –0.292                 | –0.422                |
| Silking–Maturity    | –0.345         | –0.301        | –0.527                      | 0.467                  | –0.248                 | –0.442                |
| Sowing–Maturity     | 0.175          | –0.136        | 0.183                       | 0.239                  | –0.459                 | –0.54                 |

\* significant at  $p < 0.05$ ; \*\* significant at  $p < 0.01$ .

**Table S3.** Pearson correlation between maize yield components and effective accumulated temperature ( $^{\circ}\text{C}\cdot\text{d}$ ) at different growth stages of maize in 2017 and 2018. Data shown were coefficient between two variables.

| Correlation         | Ear length(cm) | Ear rows(row) | Line grain<br>number(grain) | Bald tip<br>length(cm) | 100-grain<br>weight(g) | Bare plant<br>rate(%) |
|---------------------|----------------|---------------|-----------------------------|------------------------|------------------------|-----------------------|
| Emergence–Tasseling | –0.266         | –0.234        | –0.542                      | 0.479                  | –0.016                 | –0.130                |
| Emergence–Silking   | –0.256         | –0.243        | –0.535                      | 0.477                  | –0.042                 | –0.077                |
| Emergence–Maturity  | 0.259          | 0.270         | 0.071                       | –0.021                 | 0.208                  | 0.093                 |
| Tasseling–Maturity  | 0.499          | 0.483         | 0.569*                      | –0.474                 | 0.225                  | 0.210                 |
| Silking–Maturity    | 0.500          | 0.500         | 0.590*                      | –0.501                 | 0.250                  | 0.166                 |
| Sowing–Maturity     | 0.262          | 0.299         | 0.065                       | –0.025                 | 0.258                  | 0.095                 |

\* significant at  $p < 0.05$ .
